# Supplementary material
Source: publisher site journal article supplement (https://www.dovepress.com/article/supplementary_file/526819/Revised%20Supplementary%20Material%20without%20traces_1.docx)
Supplement: Supplementary file 1 [file Revised%20Supplementary%20Material%20without%20traces_1.docx]

**Honeysuckle-derived exosome-like nanovesicles protect against acute liver failure by modulating gut microbiota**

*Ping Li1,2,3, Yan Tang2,3,4, Yixun Chen2,3,4, Weijiao Fan2,3, Jiayu Yao2,3, Kexin Yu2,3, Yiyi Shan2,3, Jie Wang5, Xiangming Ye2, Hai Zou6*, Xiaozhou Mou2,3**

1 College of Pharmaceutical Sciences, Zhejiang University of Technology, Hangzhou, China

2 Center for Rehabilitation Medicine, Rehabilitation and Sports Medicine Research Institute of Zhejiang Province, Department of Rehabilitation Medicine, Zhejiang Provincial People's Hospital (Affiliated People's Hospital), Hangzhou Medical College, Hangzhou, China

3 Clinical Research Institute, Zhejiang Provincial People's Hospital (Affiliated People's Hospital), Hangzhou Medical College, Hangzhou, China

4 College of Life Sciences, Zhejiang Chinese Medical University, Hangzhou, China

5 EVital Bio (Hangzhou) Co., Ltd, Hangzhou, China

6 Department of Critical Care, Shanghai Cancer Center, Fudan University, Shanghai, China.
Address correspondence to: Dr. Hai Zou, [zouhai@fudan.edu.cn](mailto:zouhai@fudan.edu.cn); Dr. Xiaozhou Mou, [mouxz@zju.edu.cn](mailto:mouxz@zju.edu.cn).

**Table S1.** **List of real-time qPCR primer sets (mouse)**

| **Gene** | **Forward primer (5ʹ-3ʹ)** | **Reverse primer(5ʹ-3ʹ)** |
| --- | --- | --- |
| IL-1β | TGCCACCTTTTGACAGTGATG | TGATGTGCTGCTGCGAGATT |
| IL-6 | GACAAAGCCAGAGTCCTTCAGA | TGTGACTCCAGCTTATCTCTTGG |
| TNF-α | TAGCCCACGTCGTAGCAAAC | ACAAGGTACAACCCATCGGC |
| β-actin | CACTGTCGAGTCGCGTCC | TCATCCATGGCGAACTGGTG |
| CCL2 | CACTCACCTGCTGCTACTCA | GCTTGGTGACAAAAACTACAGC |
| CCR2 | AGGAGCCATACCTGTAAATGCC | TGTGGTGAATCCAATGCCCT |
| CCL5 | GTGCCCACGTCAAGGAGTAT | TCGAGTGACAAACACGACTG |
| CCR5 | TAGATTTGTACAGCTCTCCTAGCC | ATCCATCCTGCAAGAGCCAGA |
